# Supplementary material for: Development and Validation of an Index to Measure the Quality of Facility-Based Labor and Delivery Care Processes in Sub-Saharan Africa
Source: PLoS One. 2015 Jun 24;10(6):e0129491. doi: 10.1371/journal.pone.0129491 (PMC4479466; doi:10.1371/journal.pone.0129491)
Supplement: S1 Checklist — (XLSX) [file pone.0129491.s001.xlsx]

## Sheet: L&D Obs-Essential
S1 Checklist. MCHIP QOC Assessment Tool 5 - Observation of labor and delivery and newborn care checklist
Data collector can skip out of this part of L&D Obs form anytime that PE/E or PPH develop, then should skip back & complete sections observed.
							SECTIONS 1,2,3,7, 8: ESSENTIAL OBSTETRIC AND NEWBORN CARE
	NO.		QUESTION / TASK																		CODING								GO TO
	100		RECORD THE TIME THE OBSERVATION STARTED																				.
			(Use 24 hour clock)																				.
	SECTION 1: OBSERVATION OF INITIAL CLIENT ASSESSMENT
																				YES		……………….				1
	102		WAS THIS SECTION OBSERVED																	NO		……………….				2			200
																				IF NO: skip to first stage of labor section
			RECORD WHETHER THE PROVIDER CARRIED OUT THE
			FOLLOWING STEPS AND/OR EXAMINATIONS:																	YES			NO			DK
			(SOME OF THE FOLLOWING STEPS MAY BE PERFORMED
			SIMULTANEOUSLY OR BY MORE THAN ONE PROVIDER)
	103		Respectfully greets the pregnant woman																	1			2			8
	104		Encourages the woman to have a support person present
			throughout labor and birth																	1			2			8
	105		Asks woman (and support person, if present) if she has any questions																	1			2			8
	106		Checks client card OR asks client her age, length of pregnancy, & parity																	1			2			8
	107		Asks whether she has experienced any of the following danger signs (Ethiopia 1 question for all signs)
		01		Fever																1			2			8
		02		Foul smelling discharge																1			2			8
		03		Headaches or blurred vision																1			2			8
		04		Swollen face or hands																1			2			8
		05		Convulsions or loss of consciousness																1			2			8
		06		Shortness of breath																1			2			8
		07		Vaginal bleeding																1			2			8
	108A		Checks woman's HIV status (checks chart or asks woman)?																	YES		……………….				1
			(No HIV questions in Ethiopia, 108A to 108F)																	NO		……………….				2			109A
	108B		Is woman HIV positive?																	YES		……………….				1
																				NO		……………….				2			109A
																				DK		……………….				8			108C
	108B.1		Asks if client is currently taking ARVs																	YES		……………….				1
																				NO		……………….				2			108D.1
																				DK		……………….				8			108D.1
	108B.2		Asks client when she took last dose of ARVs																	YES		……………….				1
																				NO		……………….				2			108D.1
																				DK		……………….				8			108D.1
	108C		Offers woman HIV test																	1			2			8
	108D		Is woman HIV positive?																	YES		……………….				1
																				NO		……………….				2			109A
	108D.1		Explains why the mother should take an ARV(s)																	1			2			8
	108D.2		Explains when and how the mother should take ARV(s)																	1			2			8
	108D.3		Administers ARV(s) to mother																	1			2			8
	108E		Explains why the newborn should take an ARV(s)																	1			2			8
	108F		Explains when and how newborn should take ARV(s)																	1			2			8
	109A		Client has any previous pregnancies (not for Ethiopia)																	YES		……………….				1
																				NO		……………….				2			110
																				DK		……………….				8
	109		Asks about complications during previous pregnancies (Ethiopia 1 question for all signs)
		01		High blood pressure																1			2			8
		02		Convulsions																1			2			8
		03		Heavy bleeding during or after delivery/hemorrhage																1			2			8
		04		Previous C sections																1			2			8
		05		Prior stillbirths																1			2			8
		06		Prolonged labor																1			2			8
		07		Prior neonatal death																1			2			8
		08		Abortion																1			2			8
		09		Prior assisted delivery																1			2			8
	110		Washes his/her hand before any initial examination																	1			2			8
	111		Explains procedures to woman (support person) before proceeding																	1			2			8
	112		Takes temperature																	1			2			8
	113		Takes pulse																	1			2			8
	114		Takes blood pressure																	1			2			8
	115		Asks/notes amount of urine output																	1			2			8
	116		Tests urine for presence of protein																	1			2			8
	117		Performs general examination (e.g., for anemia, oedema)																	1			2			8
	118		Performs abdominal examination:
		01	Checks fundal height with measuring tape (Ethiopia part 1 and 2 combined)																	1			2			8
		02	Checks fetal presentation by palpation of abdomen																	1			2			8
		03	Checks fetal heart rates with fetoscope/doppler/ultrasound (Ethiopia part 2)																	1			2			8
	119		Performs vaginal examination (cervical
			dilation; fetal descent, position, membranes, meconium)																	1			2			8
	120		Informs the pregnant woman of findings																	1			2			8
	SECTION 2: INTERMITTENT OBSERVATION OF 1st STAGE OF LABOUR (UPDATE AT EACH OBSERVATION, EVERY 15-30 MIN DURING ACTIVE LABOR)
																				YES		……………….				1
	200		WAS THIS SECTION OBSERVED																	NO		……………….				2			300
																				IF NO: skip to 2nd & 3rd stage of labor
			RECORD WHETHER THE PROVIDER CARRIED OUT THE
			FOLLOWING STEPS AND/OR EXAMINATIONS:																YES				NO		DK
			(SOME OF THE FOLLOWING STEPS MAY BE PERFORMED
			SIMULTANEOUSLY OR BY MORE THAN ONE HEALTH WORKER)
	201		Action line on partograph reached																	YES		……………….				1
																				NO		……………….				2			205
	202		OBSERVER: If “action” line reached on partograph, record time																				.
				(use 24 hour clock)																			.
	203		OBSERVER: Record time that DEFINITIVE action taken																				.
				(use 24 hour clock)																			.
	204		What DEFINITIVE action was taken?
				Consult with specialist															CONSULT							1
				Referred to facility for specialist care															REFER							2
				Prepare assisted delivery															ASSISTED DELIVERY							3
				Prepare for C-section															C-SECTION							4
				Other action															OTHER							5
	205		At least once, explains what will happen in labor to the woman																	1			2			8
			and / or her support person
	206		At least once, encourages woman to consume fluids/food																	1			2			8
			throughout labor
	207		At least once, encourages/assists the woman to ambulate and																	1			2			8
			assume different positions during labor
	208		Supports the mother during labour in a friendly way																	1			2			8
	209		Drapes woman (one drape under buttocoks, one over abdomen)																	1			2			8
	210		Washes his/her hands before examination of woman																	1			2			8
	211		Wears high-level disinfected or sterile gloves for vaginal examination																	1			2			8
	212		Puts on clean protective clothing in preparation for birth that protects face,																	1			2			8
			hands and body from contact with body fluids (gloves, gown or apron, goggles)
	213		Prepares uterotonic drug to use for AMTSL
		01		Oxytocin																1			2			8
		02		Ergometrine																1			2			8
		03		Syntometrine																1			2			8
		04		Prostaglandins																1			2			8
			RECORD WHETHER THE PROVIDER CARRIED OUT THE
			FOLLOWING STEPS AND/OR EXAMINATIONS:
			(SOME OF THE FOLLOWING STEPS MAY HAVE BEEN PERFORMED BEFORE,
			OTHERS MAY BE DONE SIMULTANEOUSLY OR BY MORE THAN ONE PROVIDER)
			CHECK TO SEE IF FOLLOWING EQUIPMENT AND SUPPLIES ARE
			LAID OUT & READY FOR USE FOR NEONATAL RESUSCITATION:																YES				NO		DK
	214			Timer (clock or watch with seconds hand)																1			2			8
	215			Self-inflating ventilation bag (500 mL)																1			2			8
	216a			Face mask size 0 (Ethiopia part a and b combined as 1 question)																1			2			8
	216b			Face mask size 1																1			2			8
	217			Oxygen																1			2			8
	218			Suction catheter																1			2			8
	219			Suction machine																1			2			8
	220			Gloves																1			2			8
	221			At least 3 cloths/blankets (1 to dry;1 to cover;1 to elevate shoulders)																1			2			8
	214b
				HAS THE WOMAN COMPLETED THE FIRST STAGE OF LABOR ?																YES						1			300
																				NO						2
				IF NO: Click MENU- Save Progress so Far and then observe for questions in this section again 15-30 minutes later
	SECTION 3: CONTINUOUS OBSERVATION OF SECOND & THIRD STAGE OF LABOUR
																				YES		……………….				1
	300		WAS THIS SECTION OBSERVED																	NO		……………….				2			700
																				IF NO: skip to immediate newborn and
																				postpartum care
			RECORD WHETHER THE PROVIDER CARRIED OUT THE
			FOLLOWING STEPS AND/OR EXAMINATIONS:																	YES			NO			DK
			(SOME OF THE FOLLOWING STEPS MAY BE PERFORMED
			SIMULTANEOUSLY OR BY MORE THAN ONE PROVIDER)
	301		As baby's head is delivered, supports perineum																	1			2			8
	302		OBSERVER: Note time of the delivery of the baby																				.
			(use 24-hour clock)																				.
	302A		Verifies the absence of another fetus prior to giving the uterotonic																	1			2			8
	(ET q304)
	303		(Ethiopia only) OBSERVER: Note time the cord was clamped (use 24 hour clock)																				.
			(use 24 hour clock)																				.
	303		OBSERVER: Note time uterotonic given (use 24 hour clock) (Ethiopia q305)																				.
	(ET q305)		(use 24 hour clock)																				.
	306		Timing of administration of uterotonic
			(oxytocin, ergometrine, syntometrine, or a prostaglandin)
				a) at delivery of the anterior shoulder															ANTERIOR SHOULDER							1
				b) within 1 minute of delivery of baby															WITHIN 1 MINUTE							2
				c) within 3 minutes of delivery of baby (not for Ethiopia)															WITHIN 3 MINUTES							3
	(ET c)			d) after delivery of the placenta															AFTER PLACENTA							3
				e) does not give (not for Ethiopia)															DOES NOT GIVE							5			305
	307		Which uterotonic given?
																			Oxytocin							1
																			Ergometrine							2
																			Syntometrine							3
																			Prostaglandins							4
	308		Dose of uterotonic given and type of units of medication
			(e.g. IU, mg)																D)	DOSE
			(IF NECESSARY, ASK AFTERWARDS)																U)	UNITS
																						IU		……….		1
																						mg		…….		2
																						ML		……….		3
																						mcg		……..		4
	309		Route uterotonic given																IM				…………..			1
																			IV push (bolus)				…………..			2
																			IV drip				…………..			3
																			IV drip plus IM				…………..			4
																			ORAL				…………..			5
																			VAGINAL				…………..			6
																			SUBLINGUAL				…………..			7
																			RECTAL				…………..			8
	305		OBSERVER: Note time the cord was clamped																				.
			(use 24-hour clock)																				.
																				YES			NO			DK
	310		Applies traction to cord while applying suprapubic counter traction																	1			2			8
	311		Performs uterine massage immediately following delivery																	1			2			8
			of the placenta
	312		Assesses completeness of the placenta and membranes																	1			2			8
	313		Assesses for perineal and vaginal lacerations																	1			2			8
	SECTION 7: OBSERVATION OF IMMEDIATE NEWBORN & POSTPARTUM CARE
	700		IS THERE A NEED FOR NEWBORN RESUSCITATION																	Yes		…………………				1			608
																				No		………………..				2
																				YES			NO			DK
	701		Immediately dries baby with towel (ET q702a)																	1			2			8
	702		Discards wet towel and covers with dry towel (ET q702b)																	1			2			8
	703		Ties or clamps cord when pulsations stop, or by 2 - 3 minutes																	1			2			8
			after birth (not immediately after birth)
	704		Cuts cord with clean blade (ET cuts/ties/clamps cord, protecting newborn from blade)																	1			2			8
	704A		Places newborn on the mother’s abdomen “skin to skin” (ET q701)																	1			2			8
	705		Assists the mother to initiate breastfeeding within the first hour.																	1			2			8
	706		Provides tetracycline eye ointment prophylaxis																	1			2			8
	707A		Is the mother HIV positive (not in Ethiopia)																	1			2			8		2, 8		708
	707		Administers ARV(s) to newborn (Not in Ethiopia)																	1			2			8
	707		(Ethiopia only) Administers Vitamin K																	1			2			8
	708		Takes mother's vital signs 15 minutes after birth																	1			2			8
	709		Palpates uterus 15 minutes after delivery of placenta																	1			2			8
			Continue to cleanup and partograph review
	SECTION 8: CLEAN UP (INFECTION PREVENTION) AND REVIEW OF DOCUMENTATION
			Cleanup after birth (infection prevention)
			RECORD WHETHER THE PROVIDER CARRIED OUT THE
			FOLLOWING STEPS AND/OR EXAMINATIONS:																	YES			NO			DK
			(SOME OF THE FOLLOWING STEPS MAY BE PERFORMED
			SIMULTANEOUSLY OR BY MORE THAN ONE PROVIDER)
	801		Disposes of all sharps in puncture-proof container immediately after use																	1			2			8
	802		Decontaminates all reusable instruments in 0.5% chlorine solution																	1			2			8
	803		Disposes of all contaminated waste in leakproof containers																	1			2			8
	804		Removes apron and wipe with chlorine solution																	1			2			8
	805		Washes hands thoroughly with soap and water and dries them																	1			2			8
	805_NB		WAS THERE A NEWBORN RESUSCITATION?																	Yes		…………………				1
																				No		………………..				2			806
			CLEAN UP from NEWBORN RESUSCITATION if resuscitation performed
	805A		Disposes of disposable suction catheters and mucus extractors in a
			leak proof container or plastic bag.																	1			2			8
	805B		Takes the valve and mask apart and inspects for cracks and tears.																	1			2			8
	805C		Washes the valve and mask with 0.5% chlorine																	1			2			8
	805D		Washes valve and mask with water and detergent																	1			2			8
	805E		Rinses valve and mask in water																	1			2			8
	805F		Sterilizes or or uses high-level disinfection for valve and mask																	1			2			8
	805G		Washes hands with soap and water																	1			2			8
			REVIEW OF DOCUMENTATION OF RESUSCITATION PROCEDURES if resuscitation performed
			EXAMINE CHART TO DETERMINE IF HEALTH WORKER RECORDED
			THE FOLLOWING INFORMATION:
	805H			Time of birth																1			2			8
	805I			Condition of the newborn at birth																1			2			8
	805J			Procedures necessary to initiate breathing																1			2			8
	805K			Time from birth to spontaneous breathing or time of death if unsuccessful																1			2			8
	805L			Any clinical observations during resuscitation, including reason(s)																1			2			8
				for failure if unsuccessful
	805M			Final outcome of resuscitation measures																1			2			8
			REVIEW OF DOCUMENTATION IN CHART/PARTOGRAPH/REGISTER
	806		Completes maternity register/birth log																	1			2			8
	807		Used partograph?																		Yes		……………….			1
																					No		……………….			2			813A
	808		Which partograph used?
				Used WHO partograph (with latent phase)															OLD WHO PARTOGRAPH							1
				Used new WHO partograph (at 4 cm dilatation)															NEW WHO PARTOGRAPH							2
				Used other partograph															OTHER PARTOGRAPH							3
			IF APPLICABLE: TAKE PICTURE OF PARTOGRAPH (click to attach image)
	809		Initiated use of partograph at the appropriate time (according to
			partograph used. New WHO partograph starts at 4 cm;																	1			2			8
			old version starts at 3 cm).
	810		Completes partograph with (Ethiopia 1 question for all parts)
		01		Birth time																1			2			8
		02		Delivery method																1			2			8
		03		Estimated blood loss																1			2			8
	811		Partograph plotted at least every half hour during labor with: (Ethiopia 1 question for all parts)
		01		Frequency & duration of contractions																1			2			8
		02		Fetal heart tones																1			2			8
		03		Maternal pulse																1			2			8
	812		BP recorded on partograph at least every four hours during labor
			(as long as diastolic is less than 90mmHg)																	1			2			8
	812A		Was any recorded diastolic BP measure greater than 110?																		Yes		……………….			1
																					No		……………….			2			813A
	812B		Was MgSO4 started?																	1			2			8
	812C		Was baby delivered within four hours of measurement of diastolic BP greather																	1			2			8
			than 110?
	813A		RECORD THE OUTCOME FOR THE WOMAN
				GOES TO RECUPERATION WARD															POSTPARTUM WARD							1
				REFERRED TO OTHER PROVIDER
					IN SAME FACILITY														REFERRED SAME FACILITY							2
				GOES TO SURGERY IN SAME FACILITY															SURGERY SAME FACILITY							3
				REFERRED TO OTHER FACILITY															REFERRED OTHER FACILITY							4
				DEATH OF MOTHER															DEATH OF MOTHER							5
				DON'T KNOW															DON'T KNOW							8
	813B		RECORD THE OUTCOME FOR THE NEWBORN
				GOES TO NORMAL NURSERY															NORMAL NURSERY							1
				REFERRED TO SPECIALIST CARE SAME FACILITY (E.G., FOR KMC)															SPECIALIST SAME FACILITY							2
				REFERRED TO OUTSIDE FACILITY															OUTSIDE FACILITY							3
				WENT TO WARD WITH MOTHER															WARD WITH MOTHER							4		(not in Ethiopia)
				NEWBORN DEATH															NEWBORN DEATH							5		(ET code = 4)
				DON'T KNOW															DON'T KNOW							8
	813C		RECORD THE GRAVIDITY OF THE WOMAN (not in Ethiopia)																GRAVIDITY:
	813D		RECORD THE PARITY OF THE WOMAN PRIOR TO THIS DELIVERY (no ET)																PARITY:
	813E		RECORD HIV STATUS OF MOTHER (not in Ethiopia)																HIV POSITIVE							1
																			HIV NEGATIVE							2
																			UNKNOWN							3
	813F		RECORD TYPE OF ARV(S) GIVEN TO NEWBORN (not in Ethiopia)																NVP							1
																			AZT							2
																			3TC							3
	813G		RECORD THE TYPE OF DELIVERY																SPONTANEOUS VAGINAL							1
	(ET 813C)																		ASSISTED (INSTRUMENTED)							2
																			CESAREAN							3
																			DON'T KNOW							4
	814		DID YOU SEE ANY OF THE FOLLOWING
			PRACTICES THAT ARE NEVER INDICATED?
			(CHECK ALL THAT APPLY)
						USE OF ENEMA													ENEMA							A
						PUBIC SHAVING													PUBIC SHAVING							B
						APPLY FUNDAL PRESSURE													FUNDAL PRESSURE							C
						LAVAGE OF THE UTERUS AFTER DELIVERY													LAVAGE UTERUS							D
						SLAP NEWBORN													SLAP NEWBORN							E
						HOLD NEWBORN UPSIDE DOWN													HOLD NEWBORN DOWN							F
						MILKING THE NEWBORN'S CHEST													MILK NEWBORN							G
						EXCESSIVE STRETCHING OF THE PERINEUM (no ET)													STRETCHING OF PERINEUM							H
						Digital STRETCHING OF THE PERINEUM (no ET)													Digital STRETCHING OF PERINEUM							I
						NONE OF THE ABOVE													NONE OF ABOVE							Y
			Review the following to aid in answering the next question
	815		DID YOU SEE ANY OF THE FOLLOWING PRACTICES
			DONE WITHOUT AN APPROPRIATE INDICATION?
			DID YOU SEE ANY OF THE FOLLOWING PRACTICES WHICH SHOULD
			ONLY BE DONE IF THERE WAS APPROPRIATE INDICATION
			(CHECK ALL THAT APPLY)
						MANUAL EXPLORATION OF THE UTERUS
							AFTER DELIVERY												MANUAL EXPLORATION							A
						USE OF EPISIOTOMY													EPISIOTOMY							B
						ASPIRATION OF NEWBORN MOUTH AND NOSE													ASPIRATE NEWBORN							C
							AS SOON AS HEAD IS BORN
						RESTRICT FOOD & FLUIDS IN LABOR													RESTRICT FOOD&FLUIDS							D
						OTHER (Specify: __________________ )													OTHER							E
						NONE OF THE ABOVE													NONE OF ABOVE							Y
			END TIME																				.
			(use 24 hour clock)																				.
	816		OBSERVER WRITTEN NOTES
	817		Audio Comments (For complications only- maximum 1 minute)
				Click red button to record
			END (Tap menu and then finish session)
				Quick PE/E link						Quick PPH link
