# Supplementary material for: Development and Validation of an Index to Measure the Quality of Facility-Based Labor and Delivery Care Processes in Sub-Saharan Africa
Source: PLoS One. 2015 Jun 24;10(6):e0129491. doi: 10.1371/journal.pone.0129491 (PMC4479466; doi:10.1371/journal.pone.0129491)
Supplement: S2 Table — (DOCX) [file pone.0129491.s003.docx]

**S2 Table. Performance of potential QoPIIPC index items across QoC Assessment countries**

| Variable | Proportion of deliveries in which indicator was correctly performed (95% confidence interval) | | | |
| --- | --- | --- | --- | --- |
| Kenya | Madagascar | Tanzania Round 1 | Tanzania Round 2 |
| Checks woman's HIV status (checks chart or asks woman) and/or offers woman HIV test1 | N/A | 0.60 (0.53 - 0.67) | 0.75 (0.70 - 0.80) | 0.84 (0.79 - 0.89) |
| Asks about any danger signs in pregnancy2 | 0.33 (0.29 - 0.38) | N/A | N/A | N/A |
| Asks whether woman has experienced fever | N/A | 0.21 (0.15 - 0.27) | 0.11 (0.07 - 0.15) | 0.34 (0.28 - 0.41) |
| Asks whether woman has experienced convulsions or loss of consciousness | N/A | 0.09 (0.05 - 0.13) | 0.08 (0.04 -0.11) | 0.21 (0.15 - 0.26) |
| Asks whether has experienced headaches or blurred vision | N/A | 0.16 (0.11 - 0.21) | 0.15 (0.11 - 0.19) | 0.51 (0.44 - 0.58) |
| Asks whether woman has experienced vaginal bleeding | N/A | 0.31 (0.25 - 0.38) | 0.38 (0.32 - 0.44) | 0.67 (0.61 - 0.73) |
| Takes temperature | 0.43 (0.38 - 0.48) | 0.47 (0.40 - 0.54) | 0.42 (0.36 - 0.48) | 0.33 (0.27 - 0.39) |
| Takes pulse | 0.59 (0.54 - 0.64) | 0.46 (0.39 - 0.53) | 0.55 (0.49 - 0.61) | 0.47 (0.41 - 0.54) |
| Takes blood pressure | 0.74 (0.70 - 0.79) | 0.78 (0.72 - 0.84) | 0.86 (0.82 - 0.90) | 0.94 (0.90 - 0.97) |
| Tests urine for presence of protein | 0.11 (0.08 - 0.14) | 0.04 (.01 - 0.06) | 0.06 (0.03 - 0.09) | 0.08 (0 .04 - 0.11) |
| Washes his/her hand before initial examination | 0.35 (0.30 - 0.40) | 0.69 (0.62 - 0.75) | 0.61 (0.55 - 0.67) | 0.69 (0.63 - 0.76) |
| Washes his/her hand before examination in labor | 0.31 (0.26 - 0.35) | 0.77 (0.71 - 0.82) | .59 (0.53 - 0.65) | 0.71 (0.65 - 0.78) |
| Abdominal examination (fetal presentation & fetal heart rate) | 0.97 (0.95 - 0.99) | 0.90 (0.85 - 0.94) | 0.91 (0.88 - 0.95) | 0.75 (0.69 - 0.80) |
| Vaginal examination (cervical dilation; fetal descent, position, membranes, meconium) | 0.99 (0.98 - 1.00) | 0.98 (0.96 - 1.00) | 0.99 (0.98 - 1.00) | 0.99 (0.98 - 1.00) |
| Wears high-level disinfected or sterile gloves for vaginal examination | 0.99 (0.98 - 1.00) | 0.74 (0.68 - 0.80) | 0.96 (0.93 - 0.98) | 0.99 (0.97 - 1.00) |
| At least once, explains what will happen in labor to the woman and/or her support person | 0.65 (0.61 - 0.70) | 0.51 (0.45 -0.58) | 0.58 (0.52 - 0.64) | 0.77 (0.71 - 0.82) |
| Uses partograph | 0.81 (0.77 - 0.85) | 0.36 (0.29 - 0.42) | 0.80 (0.76- 0.85) | 0.87 (0.82 - 0.92) |
| Prepares uterotonic drug to use for AMTSL | 0.93 (0.90 - 0.95) | 0.74 (0.68 - 0.80) | 0.94 (0.91 - 0.97) | 0.93 (0.90 - 0.96) |
| Prepares items for neonatal resuscitation | 0.41 (0.36 - 0.46) | N/A | N/A | N/A |
| Self-inflating ventilation bag (500mL) and face masks (size 0 and size 1) are laid out and ready for use for neonatal resuscitation3 | N/A | 0.27 (0.21 - 0.33) | 0.32 (0.27 - 0.38) | 0.55 (0.49 - 0.62) |
| At least 3 cloths/blankets (1 to dry, 1 to cover, 1 to elevate shoulders) are laid out and ready for use for neonatal resuscitation | N/A | 0.79 (0.73 - 0.84) | 0.39 (0.33 - 0.45) | 0.71 (0.65 - 0.77) |
| Puts on clean protective clothing in preparation for birth that protects face, hands, and body from contact with body fluids | 0.68 (0.63 - 0.72) | 0.60 (0.53 - 0.66) | 0.37 (0.31 - 0.43) | 0.50 0.44 - 0.57) |
| As baby's head is delivered, supports perineum | 0.97 (0.95 - 0.98) | 0.77 (0.71 - 0.83) | 0.87 (0.83 - 0.91) | 0.89 (0.84 - 0.93) |
| Correctly administers uterotonic (timing, dose, route) | 0.68 0.63 - 0.73) | 0.55 (0.48 - 0.62) | 0.59 (0.53 - 0.65) | 0.74 (0.68 - 0.80) |
| Performs uterine massage immediately after delivery of placenta | 0.87 (0.83 - 0.90) | 0.55 (0.48 - 0.62) | 0.55 (0.49- 0.60) | 0.91 (0.88 - 0.95) |
| Assesses for perineal and vaginal lacerations | 0.99 (0.98 - 1.00) | 0.84 (0.79 - 0.89) | 0.92 (0.89 - 0.95) | 0.98 (0.96 - 1.00) |
| Assesses completeness of placenta and membranes | 0.64 (0.59 - 0.68) | 0.66 (0.60 - 0.73) | 0.57 (0.51 - 0.62) | 0.86 (0.82 - 0.91) |
| Immediately dries baby with towel | 0.57 (0.53 - 0.62) | 0.97 (0.94 - 0.99) | 0.80 (0.75 - 0.85) | 0.95 (0.92 - 0.98) |
| Discards wet towel and covers with dry towel4 | N/A | 0.81 (0.76- 0.86) | 0.79 (0.74- 0.83) | 0.95 (0.93 -0.98) |
| Places newborn on mother’s abdomen skin-to-skin | 0.63 (0.58 - 0.67) | 0.29 (0.23- 0.35) | 0.46 (0.40 - 0.52) | 0.78 (0.72 - 0.84) |
| Ties or clamps cord when pulsations stop, or by 2 - 3 minutes after birth (not immediately after birth) | 0.44 (0.39 - 0.49) | 0.75 (0.69 -0.81) | 0.70 (0.65- 0.76) | 0.85 (0.80 - 0.90) |
| Cuts cord with clean blade | 0.96 (0.94 - 0.98) | 0.75 (0.69 - 0.81) | 0.99 (0.97 - 1.00) | 0.99 (0.98 - 1.00) |
| Disposes of all sharps in puncture-proof container immediately after use | 0.96 (0.94 - 0.98) | 0.94 (0.91 - 0.97) | 0.92 (0.89 - 0.95) | 0.98 (0.96 - 1.00) |
| Takes mother's vital signs 15 minutes after birth | 0.32 (0.27 - 0.36) | 0.44 (0.37 - 0.51) | 0.28 (0.22 - 0.33) | 0.28 (0.22 - 0.34) |
| Palpates uterus 15 minutes after delivery of placenta | 0.19 (0.15 - 0.23) | 0.58 (0.51 - 0.65) | 0.23 (0.18 - 0.28) | 0.36 (0.29 - 0.42) |
| Assists mother to initiate breastfeeding within one hour | 0.78 (0.73 - 0.82) | 0.34 (0.28 - 0.41) | 0.43 (0.37 - 0.49) | 0.90 (0.85 - 0.94) |

1The HIV/AIDS question was not asked in Kenya

2Separate questions about danger signs were not asked in Kenya.

3Separate questions about neonatal resuscitation preparation items were not asked in Kenya

4Questions about immediate drying, discarding of wet towel, and wrapping in dry towel were combined in Kenya.
